# Supplementary material for: COVID-19: incidence and mortality in Sweden comparing all foreign-born to all Swedish-born individuals in different occupations in an unvaccinated cohort of year 2020
Source: HighWire-hosted journal article supplement (doi:10.1136/oemed-2023-108952), 2024-01-24
Supplement: oemed-2023-108952supp001_data_supplement.pdf [file oemed-2023-108952supp001_data_supplement.pdf]

## Appendix 1. Classification of Swedish municipalities by Swedish Association of Local Authorities and Regions.

| Cities                                                           | Subdivisions                                                                                                                                                                          |
|------------------------------------------------------------------|---------------------------------------------------------------------------------------------------------------------------------------------------------------------------------------|
| A. Large cities and municipalities near large cities             | A1. Large cities - municipalities with a population of at least 200 000 inhabitants with at least 200 000 inhabitants in the largest urban area                                       |
|                                                                  | A2. Commuting municipalities near large cities – municipalities where more than 40 % of the working population commute to work in a large city or municipality near a large city      |
| B. Medium-sized towns and municipalities near medium-sized towns | B1. Medium-sized towns – municipalities with a population of at least 50 000 inhabitants with at least 40 000 inhabitants in the largest urban area                                   |
|                                                                  | B2. Commuting municipalities near medium-sized towns - municipalities where more than 40 % of the working population commute to work in a medium-sized town                           |
|                                                                  | B3. Commuting municipalities with a low commuting rate near medium-sized towns - municipalities where less than 40 % of the working population commute to work in a medium-sized town |
| C. Smaller towns/urban areas and rural municipalities            |                                                                                                                                                                                       |

Appendix 2. Population at baseline 31 December 2019 and number of clinical cases of COVID-19 with a positive PCR test (ICD-10 code of U07.1) or without a positive PCR-test (ICD-10 code of U07.2) during the follow-up to 31 December 2020.

| Age (years) | Population 31 December 2019 |              | Follow-up 1 January 2020 to 31 December 2020 |              |                   |              |                  |              |                  |              |              |              |              |              |
|-------------|-----------------------------|--------------|----------------------------------------------|--------------|-------------------|--------------|------------------|--------------|------------------|--------------|--------------|--------------|--------------|--------------|
|             |                             |              | Outpatients U07.1                            |              | Outpatients U07.2 |              | Inpatients U07.1 |              | Inpatients U07.2 |              | Death U07.1  |              | Death U07.2  |              |
|             | Foreign-born                | Swedish-born | Foreign-born                                 | Swedish-born | Foreign-born      | Swedish-born | Foreign-born     | Swedish-born | Foreign-born     | Swedish-born | Foreign-born | Swedish-born | Foreign-born | Swedish-born |
| 20-24       | 130890                      | 451905       | 268                                          | 526          | 117               | 293          | 177              | 264          | 39               | 84           | 1            | 3            | 0            | 1            |
| 25-29       | 166633                      | 570134       | 370                                          | 899          | 211               | 464          | 306              | 476          | 41               | 129          | 0            | 9            | 0            | 0            |
| 30-34       | 212899                      | 500818       | 591                                          | 760          | 305               | 460          | 509              | 451          | 66               | 159          | 5            | 10           | 0            | 1            |
| 35-39       | 215344                      | 433442       | 750                                          | 704          | 358               | 372          | 687              | 417          | 54               | 104          | 2            | 9            | 0            | 1            |
| 40-44       | 184508                      | 444949       | 767                                          | 846          | 401               | 445          | 762              | 551          | 58               | 93           | 10           | 12           | 0            | 0            |
| 45-49       | 159681                      | 505086       | 856                                          | 1241         | 379               | 603          | 1015             | 975          | 53               | 121          | 25           | 23           | 0            | 2            |
| 50-54       | 143612                      | 531542       | 932                                          | 1521         | 386               | 657          | 1206             | 1299         | 65               | 149          | 33           | 49           | 1            | 2            |
| 55-59       | 127683                      | 490230       | 925                                          | 1341         | 381               | 580          | 1402             | 1410         | 78               | 227          | 85           | 72           | 0            | 8            |
| 60-64       | 101508                      | 462106       | 760                                          | 1257         | 283               | 573          | 1235             | 1603         | 97               | 257          | 87           | 139          | 4            | 7            |
| 65-69       | 80018                       | 452719       | 491                                          | 919          | 202               | 540          | 965              | 1596         | 92               | 319          | 123          | 283          | 8            | 11           |
| 70-74       | 65579                       | 487054       | 379                                          | 1099         | 178               | 633          | 786              | 2305         | 95               | 518          | 188          | 632          | 8            | 38           |
| 75-79       | 45224                       | 376619       | 298                                          | 1206         | 114               | 703          | 690              | 2700         | 78               | 525          | 239          | 1077         | 8            | 64           |
| 80-84       | 31837                       | 236074       | 259                                          | 1058         | 92                | 578          | 663              | 2668         | 72               | 470          | 358          | 1531         | 20           | 80           |
| 85-88       | 11100                       | 94473        | 99                                           | 555          | 36                | 277          | 283              | 1418         | 34               | 233          | 210          | 1081         | 5            | 53           |
| Total       | 1676516                     | 6037151      | 7745                                         | 13932        | 3443              | 7178         | 10686            | 18133        | 922              | 3388         | 1366         | 4930         | 54           | 268          |

Appendix 3. Crude incidence rate per 1000 inhabitants in working age 20-64 years. Number of cases in parenthesis. Job titles according to SSYK2012 divided by female (F), male (M), foreign- and Swedish-born, respectively. Clinical cases of COVID-19 are presented having a positive PCR test (ICD-10 code U07.1) or without a positive PCR-test (ICD-10 code U07.2), respectively.

|                        |     | Crude incidence rate per 1000 inhabitants in 2020 (number of cases with COVID-19) |              |                   |              |                  |              |                  |              |              |              |              |              |
|------------------------|-----|-----------------------------------------------------------------------------------|--------------|-------------------|--------------|------------------|--------------|------------------|--------------|--------------|--------------|--------------|--------------|
|                        |     | Outpatients U07.1                                                                 |              | Outpatients U07.2 |              | Inpatients U07.1 |              | Inpatients U07.2 |              | Death U07.1  |              | Death U07.2  |              |
| SSYK2012               | Sex | Foreign-born                                                                      | Swedish-born | Foreign-born      | Swedish-born | Foreign-born     | Swedish-born | Foreign-born     | Swedish-born | Foreign-born | Swedish-born | Foreign-born | Swedish-born |
| 22-23 <sup>1</sup>     | F   | 5.47 (343)                                                                        | 3.89 (1285)  | 2.03 (127)        | 1.17 (385)   | 3.65 (229)       | 1.70 (560)   | 0.41 (26)        | 0.26 (86)    | 0.02 (1)     | 0.03 (9)     | 0.00 (0)     | 0.00 (0)     |
|                        | M   | 7.27 (230)                                                                        | 3.73 (370)   | 2.15 (68)         | 1.05 (104)   | 7.43 (235)       | 2.68 (266)   | 0.38 (12)        | 0.22 (22)    | 0.32 (10)    | 0.06 (6)     | 0.00 (0)     | 0.01 (1)     |
| 51-53 <sup>2</sup>     | F   | 7.21 (1267)                                                                       | 3.29 (1886)  | 2.46 (432)        | 1.13 (649)   | 5.08 (894)       | 1.57 (900)   | 0.43 (75)        | 0.37 (211)   | 0.03 (6)     | 0.02 (13)    | 0.00 (0)     | 0.00 (0)     |
|                        | M   | 5.28 (478)                                                                        | 2.04 (451)   | 2.42 (219)        | 1.03 (228)   | 6.59 (597)       | 1.88 (417)   | 0.41 (37)        | 0.16 (36)    | 0.23 (21)    | 0.06 (13)    | 0.01 (1)     | 0.00 (0)     |
| 83 <sup>3</sup>        | F   | 3.99 (7)                                                                          | 1.03 (12)    | 1.71 (3)          | 1.55 (18)    | 2.28 (4)         | 0.26 (3)     | 0.00 (0)         | 0.43 (5)     | 0.00 (0)     | 0.00 (0)     | 0.00 (0)     | 0.00 (0)     |
|                        | M   | 5.82 (199)                                                                        | 1.37 (142)   | 2.72 (93)         | 1.12 (116)   | 10.38 (355)      | 2.13 (220)   | 0.73 (25)        | 0.27 (28)    | 0.50 (17)    | 0.11 (11)    | 0.00 (0)     | 0.00 (0)     |
| All other <sup>4</sup> | F   | 3.13 (639)                                                                        | 1.62 (1540)  | 1.58 (323)        | 0.93 (885)   | 3.08 (628)       | 1.10 (1041)  | 0.29 (59)        | 0.27 (256)   | 0.08 (16)    | 0.03 (28)    | 0.00 (0)     | 0.00 (1)     |
|                        | M   | 3.46 (1132)                                                                       | 1.53 (2244)  | 1.76 (576)        | 0.81 (1181)  | 4.81 (1572)      | 1.69 (2473)  | 0.26 (85)        | 0.20 (293)   | 0.17 (57)    | 0.06 (87)    | 0.00 (0)     | 0.00 (5)     |
| Missing <sup>5</sup>   | F   | 3.77 (1029)                                                                       | 1.80 (585)   | 1.85 (505)        | 1.53 (495)   | 4.64 (1265)      | 1.96 (636)   | 0.45 (122)       | 0.53 (173)   | 0.11 (31)    | 0.19 (61)    | 0.00 (1)     | 0.03 (9)     |
|                        | M   | 3.47 (920)                                                                        | 1.62 (657)   | 1.86 (493)        | 1.09 (440)   | 5.83 (1548)      | 2.39 (968)   | 0.43 (113)       | 0.55 (224)   | 0.34 (89)    | 0.24 (98)    | 0.01 (3)     | 0.01 (6)     |
| Total                  | F   | 4.58 (3285)                                                                       | 2.43 (5308)  | 1.94 (1390)       | 1.11 (2432)  | 4.21 (3020)      | 1.44 (3140)  | 0.39 (282)       | 0.33 (731)   | 0.08 (54)    | 0.05 (111)   | 0.00 (1)     | 0.00 (10)    |
|                        | M   | 3.95 (2959)                                                                       | 1.69 (3864)  | 1.94 (1449)       | 0.90 (2069)  | 5.75 (4307)      | 1.90 (4344)  | 0.36 (272)       | 0.26 (603)   | 0.26 (194)   | 0.09 (215)   | 0.01 (4)     | 0.01 (12)    |

<sup>1</sup>corresponding to ISCO-08 code 22 Health Professionals and 23 Teaching Professionals

<sup>2</sup>corresponding to ISCO-08 code 51 Personal Service workers. 52 Sales Workers and 53 Personal Care Workers

<sup>3</sup>corresponding to ISCO-08 code 83 Drivers and Mobile Plant Operators

<sup>4</sup>All other SSYK-codes lumped together

<sup>5</sup>Missing code according to SSYK e.g. unemployed. students
